# Supplementary material
Source: publisher figshare collection journal article supplement (https://tandf.figshare.com/ndownloader/files/23103272)
Supplement: Supplementary file 1 [file 23103272]

**Supplemental Files**


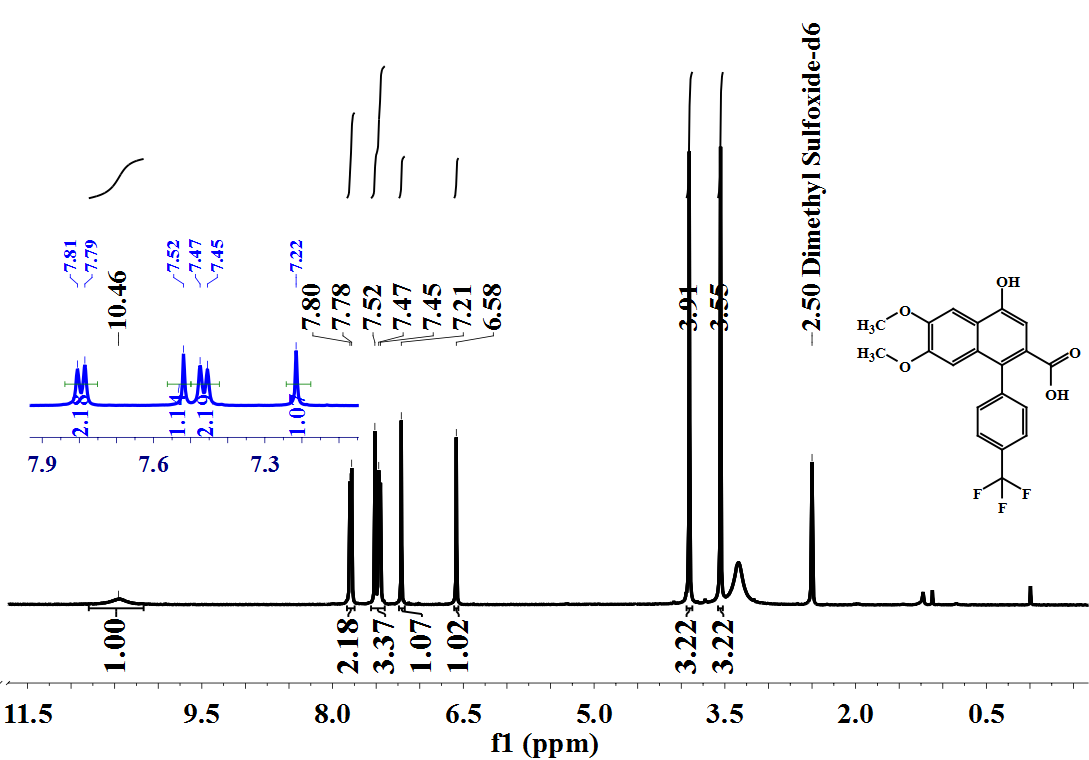


**Figure S1. 1HNMR of A**


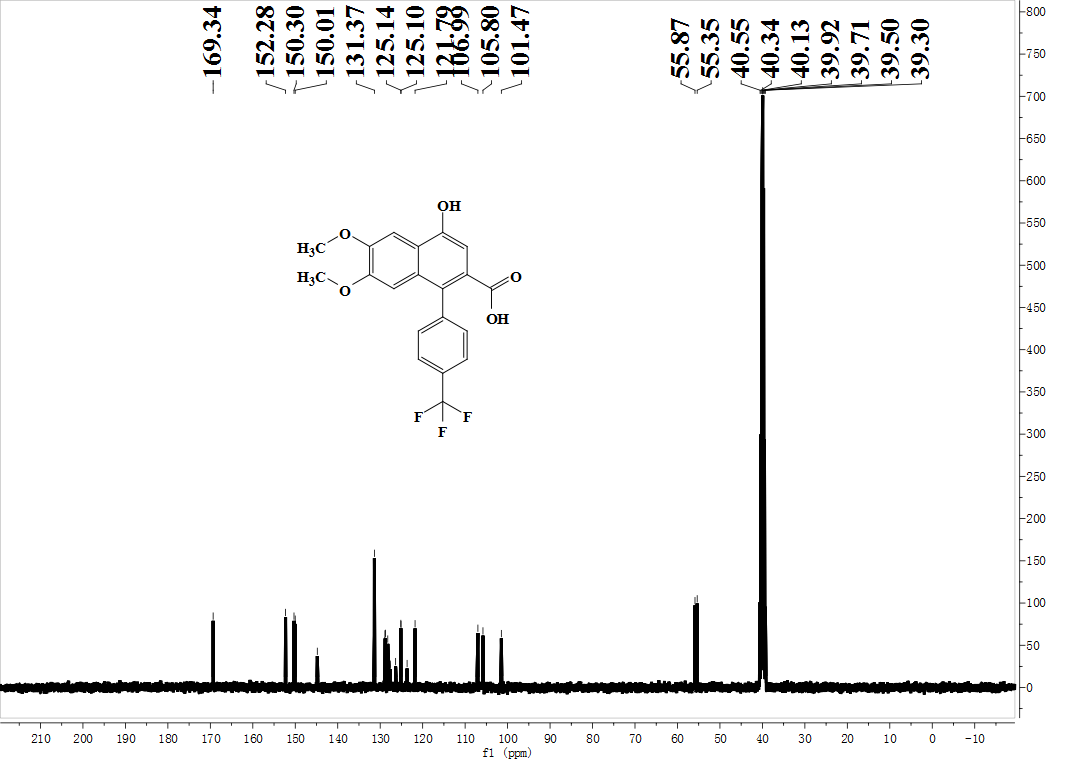


**Figure S2. 13CNMR of A**

**
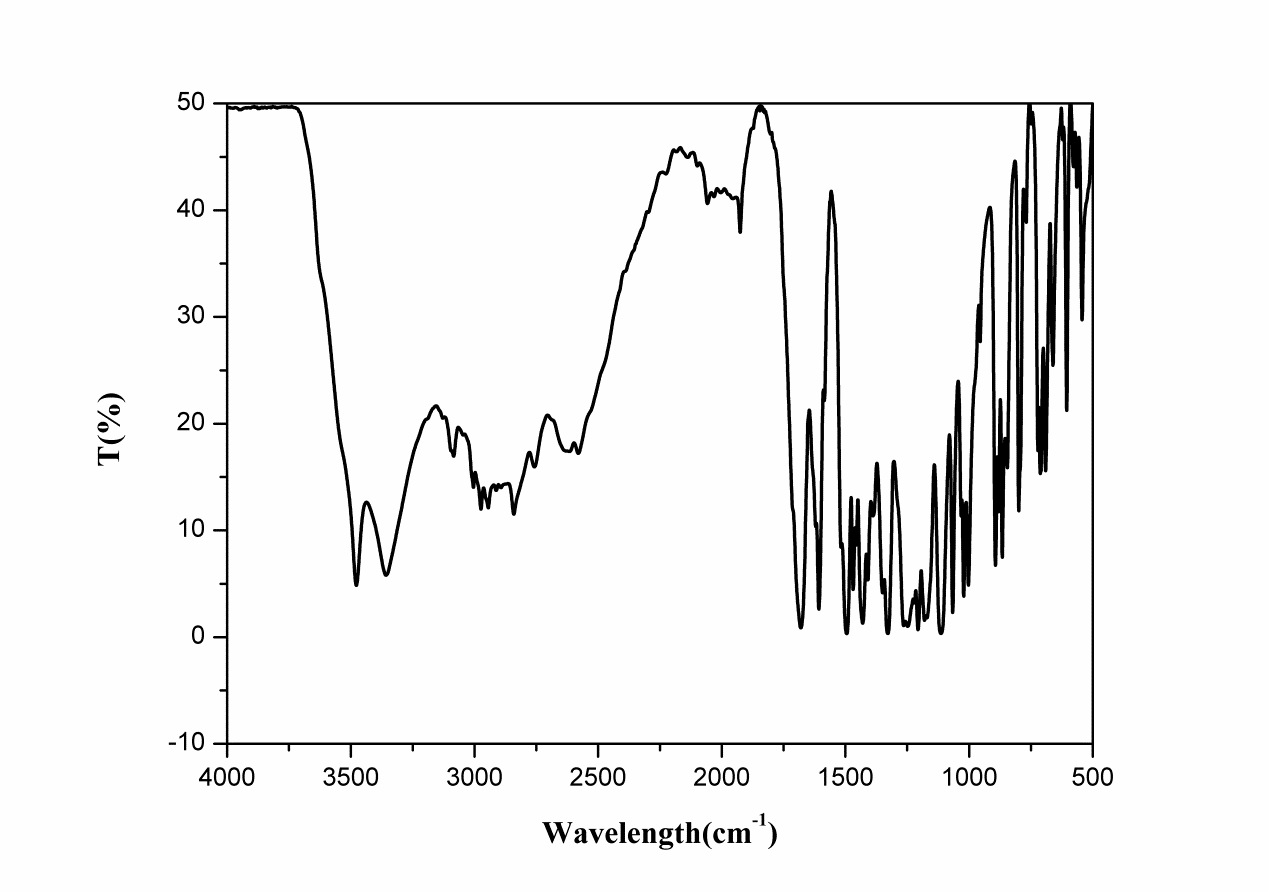
**

**Figure S3. FI-R o**


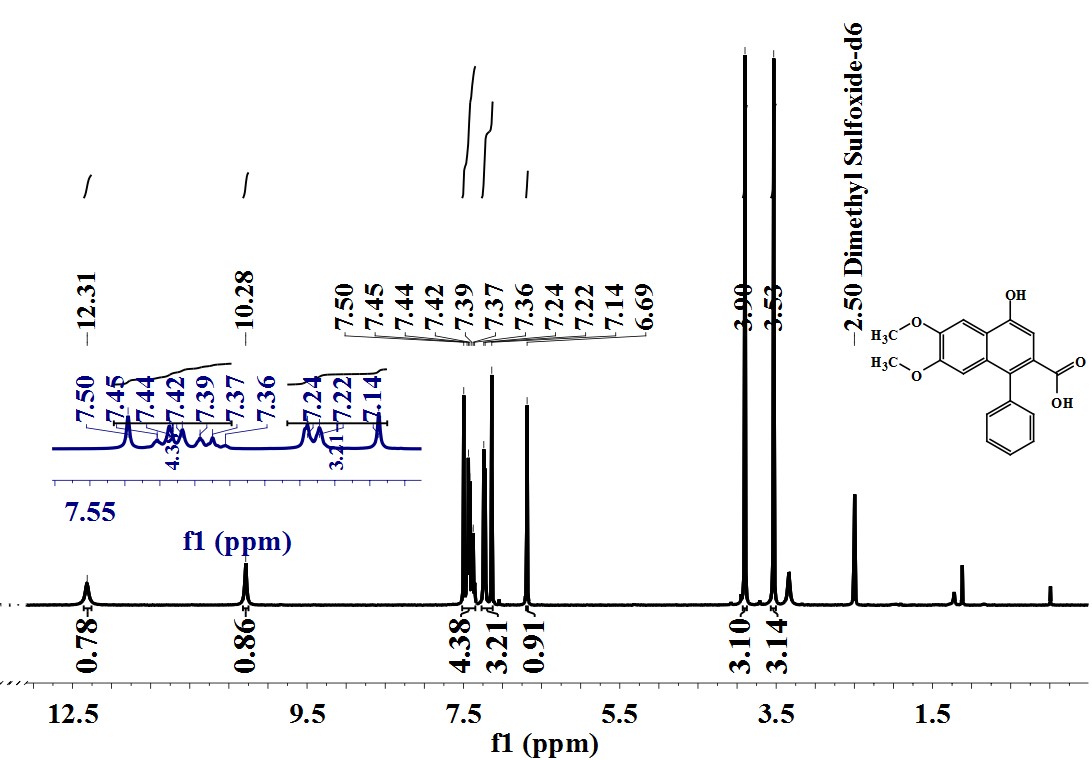


**Figure S4. 1HNMR of B**

**
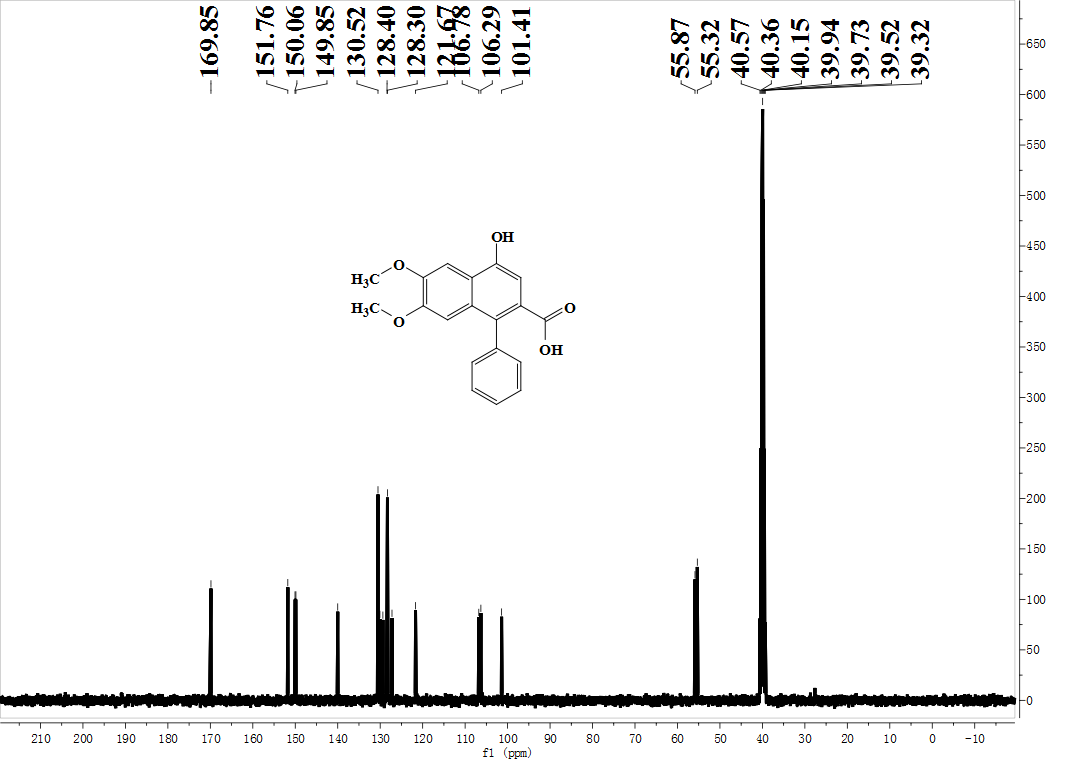
**

**Figure S5. 13CNMR of B**

**
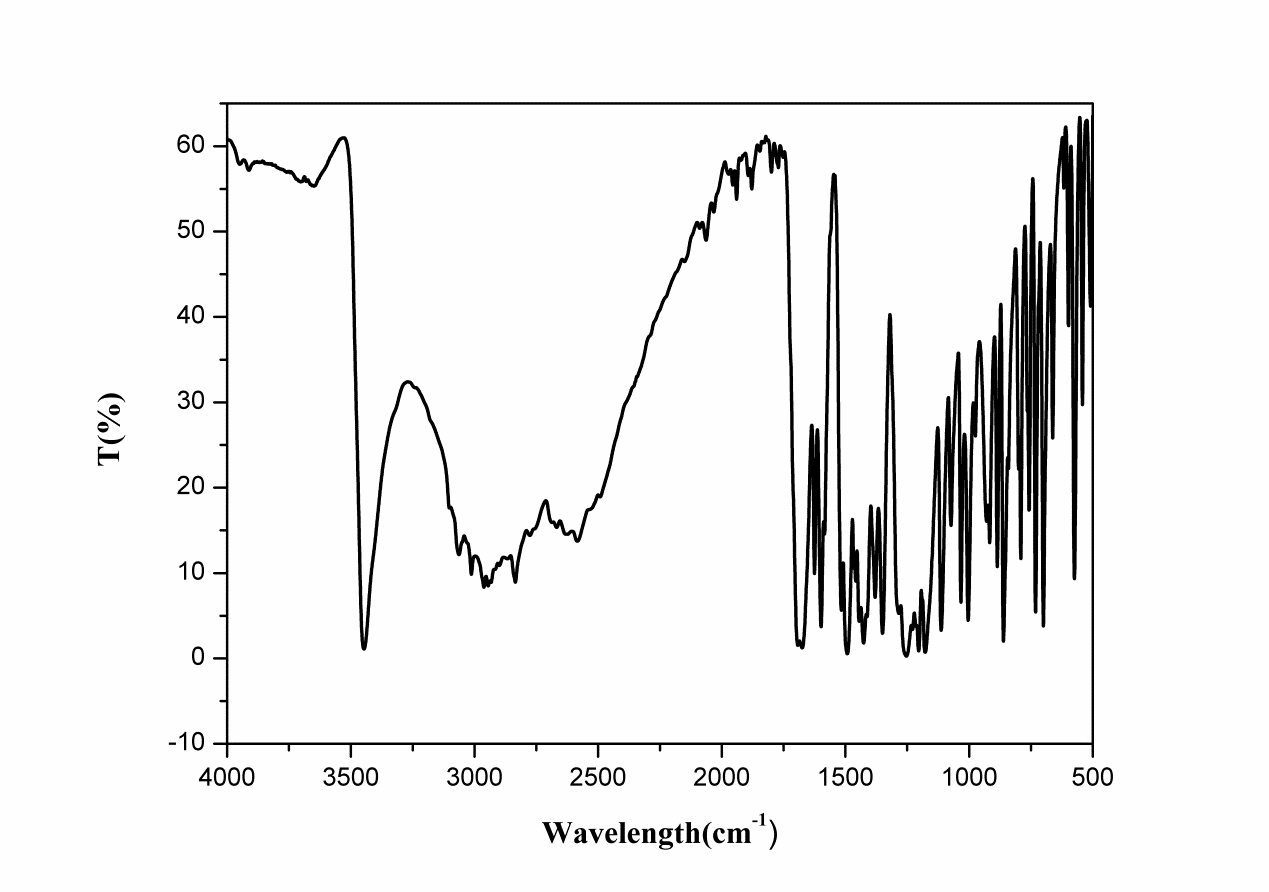
**

**Figure S6. FI-R of B**
